# Supplementary material
Source: Springer Nature journal article supplement (https://www.springermedizin.de/resource/supplementary/12874_2011_708_MOESM4_ESM.pdf/9432832)

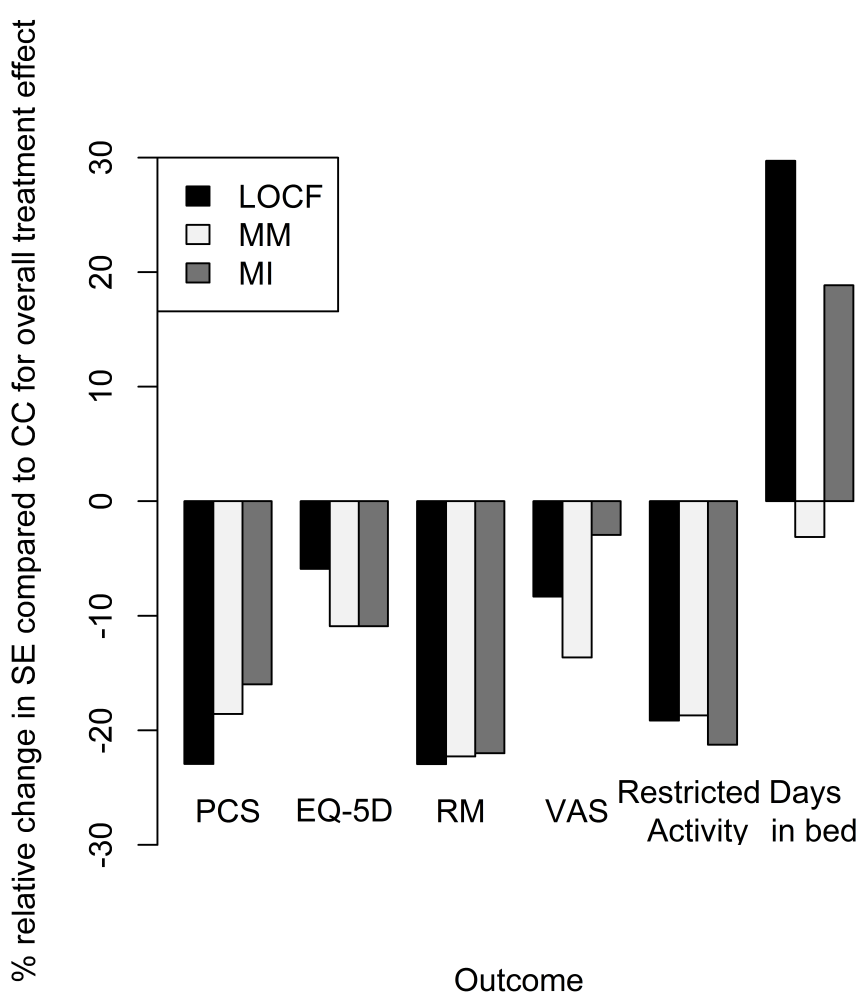

Supplement: MOESM4 [file 9432832]
